# Supplementary material for: Synthesis of cyclic peptides with antioxidant and skin-lightening properties
Source: Research Square preprint supplement (doi:10.21203/rs.3.rs-7205295/v1), 2025-07-29
Supplement: Supplementary file 1 [file 2bbf0a47139613e074ff0583.docx]

**Supporting Figure S1** (a) Effect of linear CYGSR on viability of RAW 264 (b) Antioxidant effect of linear CYGSR by DPPH method (IC₅₀ of 394.1 μg/mL) (c) Tyrosinase inhibitory activity of linear CYGSR (IC₅₀ of 687.2 μg/mL)

**Supporting Figure S2** (a) Antioxidant effect by DPPH method of control ascorbic acid of CR5 (IC₅₀ of 1.99 μg/mL) (b) Tyrosinase inhibitory activity of control β-arbutin of CR5 (IC₅₀ of 160.12 μg/mL)


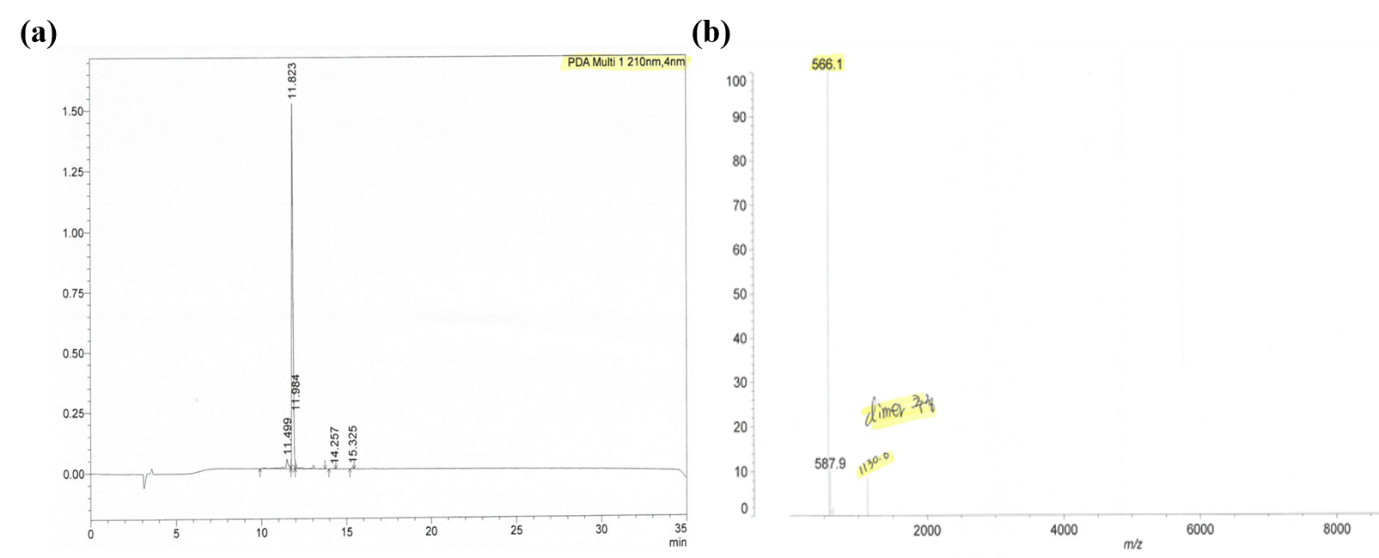


**Supporting Figure S3** (a) HPLC chromatogram of the synthesized CR5, monitored at 210 nm (b) LC-MS spectrum of the synthesized CR5 (m/z 566.1)
